# Supplementary material for: Atmospheric effects of air pollution during dry and wet periods in São Paulo
Source: Royal Society of Chemistry journal article supplement (doi:10.1039/d1ea00080b), 2021-12-23
Supplement: d1ea00080b1.pdf [file d1ea00080b1.pdf]

**Supplementary material for**

**Atmospheric effects of air pollution during dry and wet periods on São Paulo**

Sergio Ibarra-Espinosa<sup>1</sup>, Gyrlene Aparecida Mendes da Silva<sup>2</sup>, Amanda Rehbein<sup>1</sup>, Angel Vara-Vela<sup>1,3</sup>, Edmilson Dias de Freitas<sup>1</sup>

<sup>1</sup> Department of Atmospheric Sciences, Institute of Astronomy, Geophysics and Atmospheric Sciences, University of São Paulo, Brazil

<sup>2</sup> Sea Institute, Federal University of São Paulo, Santos-SP, Brazil

<sup>3</sup> Federal University of Technology - Parana, Londrina, Brazil

Author correspondence: [sergio.ibarra@usp.br](mailto:sergio.ibarra@usp.br)

Table 1. Observation sites considered in this study

| Area | Station                         | Longitude | Latitude | Area | Station                          | Longitude | Latitude |
|------|---------------------------------|-----------|----------|------|----------------------------------|-----------|----------|
|      | Santana                         | -46.6290  | -23.5060 |      | Cubatão-Vila Parisi              | -46.3887  | -23.8494 |
|      | Santo Amaro                     | -46.7100  | -23.6550 |      | Cubatão-Centro                   | -46.4185  | -23.8790 |
|      | Mauá                            | -46.4660  | -23.6685 | SAN  | Cubatão-Vale do Mogi             | -46.3696  | -23.8316 |
|      | Parque D. Pedro II              | -46.6277  | -23.5448 |      | Santos                           | -46.3212  | -23.9631 |
|      | Congonhas                       | -46.6635  | -23.6163 |      | Santos-Ponta da Praia            | -46.3005  | -23.9813 |
|      | Ibirapuera                      | -46.6607  | -23.5918 |      | Sorocaba                         | -47.4790  | -23.5024 |
|      | Mooça                           | -46.6004  | -23.5497 | SOR  | Tatuí                            | -47.8708  | -23.3608 |
|      | São Caetano do Sul              | -46.5564  | -23.6184 |      | Campinas-Centro                  | -47.0572  | -22.9025 |
|      | Cerqueira César                 | -46.6727  | -23.5535 |      | Americana                        | -47.3475  | -22.7245 |
|      | Diadema                         | -46.6116  | -23.6859 |      | Jundiaí                          | -46.8971  | -23.1920 |
|      | Cid. Universitária-USP-IPEN     | -46.7374  | -23.5663 |      | Paulínia-Sul                     | -47.1366  | -22.7868 |
|      | Nossa Senhora do Ó              | -46.6921  | -23.4801 | CAM  | Piracicaba                       | -47.6497  | -22.7012 |
|      | Itaquera                        | -46.4667  | -23.5800 |      | Paulínia                         | -47.1548  | -22.7723 |
|      | Parelheiros                     | -46.6970  | -23.7763 |      | Santa Gertrudes                  | -47.5363  | -22.4600 |
|      | Pinheiros                       | -46.7020  | -23.5615 |      | Campinas-Vila União              | -47.1193  | -22.9467 |
|      | São Bernardo do Campo-Paulicéia | -46.5847  | -23.6714 |      | Campinas-Taquaral                | -47.0590  | -22.8746 |
| MASP | Taboão da Serra                 | -46.7583  | -23.6093 |      | Limeira                          | -47.4143  | -22.5636 |
|      | Osasco                          | -46.7921  | -23.5267 |      | São José dos Campos              | -45.8712  | -23.1879 |
|      | Santo André-Paço Municipal      | -46.5309  | -23.6570 |      | Jacareí                          | -45.9682  | -23.2942 |
|      | Interlagos                      | -46.6750  | -23.6805 | SJDC | São José dos Campos-Jd. Satélite | -45.8908  | -23.2236 |
|      | Carapicuíba                     | -46.8358  | -23.5314 |      | São José dos Campos-Vista Verde  | -45.8309  | -23.1837 |
|      | Guarulhos-Paço Municipal        | -46.5185  | -23.4555 |      | Taubaté                          | -45.5758  | -23.0324 |
|      | Itaim Paulista                  | -46.4207  | -23.5015 |      |                                  |           |          |
|      | Capão Redondo                   | -46.7800  | -23.6684 |      |                                  |           |          |
|      | Marg. Tietê-Ponte dos Remédios  | -46.7433  | -23.5187 |      |                                  |           |          |
|      | São Bernardo do Campo-Centro    | -46.5462  | -23.6987 |      |                                  |           |          |
|      | Guarulhos-Pimentas              | -46.4099  | -23.4401 |      |                                  |           |          |
|      | Guarulhos-Pimentas              | -46.4962  | -23.4632 |      |                                  |           |          |
|      | Pico do Jaraguá                 | -46.7661  | -23.4563 |      |                                  |           |          |
|      | Mogi das Cruzes                 | -46.7921  | -23.5267 |      |                                  |           |          |
|      | Mirante de Santana              | -46.6167  | -23.4833 |      |                                  |           |          |

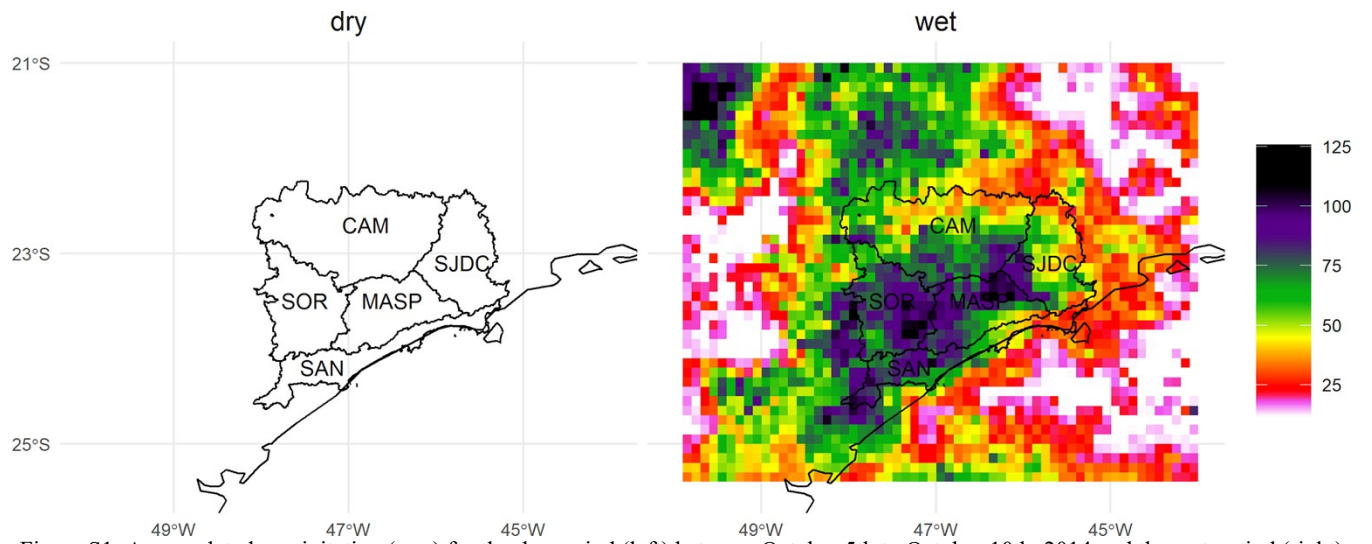

Figure S1. Accumulated precipitation (mm) for the dry period (left) between October 5th to October 10th, 2014 and the wet period (right) between October 31st to November 5th, 2014. The polygons represent the expanded metropolitan areas considered in this study Campinas (CAM), Sorocaba (SOR), Santos (SAN), São Paulo (MASP), and São José dos Campos (SJDC).

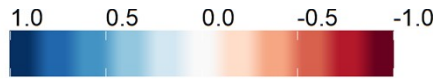

|       |   |      |      |     |     |      |     |     |     |
|-------|---|------|------|-----|-----|------|-----|-----|-----|
| WS    | 1 | .61  | .61  |     |     | .57  | .56 | .71 | WET |
|       |   | .76  | .78  |     |     | .69  | .75 | .81 |     |
| WS    | 0 | .61  | .61  |     |     | .57  | .56 | .71 | WET |
|       |   | .76  | .78  |     |     | .69  | .75 | .81 |     |
| T2    | 1 | .8   | .9   | .49 |     | .85  | .86 | .91 | WET |
|       |   | .92  | .95  | .74 |     | .97  | .96 | .97 |     |
| T2    | 0 | .8   | .9   | .49 |     | .85  | .86 | .91 | WET |
|       |   | .92  | .95  | .74 |     | .97  | .96 | .97 |     |
| RH    | 1 | .79  | .83  | .64 |     | .79  | .81 | .87 | WET |
|       |   | .85  | .86  | .8  |     | .81  | .89 | .89 |     |
| RH    | 0 | .79  | .83  | .64 |     | .79  | .81 | .87 | WET |
|       |   | .85  | .86  | .8  |     | .81  | .89 | .89 |     |
| PP    | 1 | .42  | .38  |     |     | .33  | .42 | .56 | WET |
|       |   | .49  | .49  |     |     |      | .49 |     |     |
| PP    | 0 | .42  | .38  |     |     | .33  | .42 | .56 | WET |
|       |   | .49  | .49  |     |     |      | .49 |     |     |
| PM2.5 | 1 | .37  |      |     |     | .26  | .47 |     | WET |
|       |   | .46  |      |     |     | .29  | .64 |     |     |
| PM2.5 | 0 | .37  |      |     |     | .26  | .47 |     | WET |
|       |   | .46  |      |     |     | .29  | .64 |     |     |
| PM10  | 1 | .36  | .31  | .34 |     | .41  | .46 | .29 | WET |
|       |   | .37  | .3   | .35 |     | .35  | .55 | .29 |     |
| PM10  | 0 | .36  | .31  | .34 |     | .41  | .46 | .29 | WET |
|       |   | .37  | .3   | .35 |     | .35  | .55 | .29 |     |
| O3    | 1 | .58  | .55  | .71 |     | .47  | .69 | .49 | WET |
|       |   | .53  | .48  | .66 |     | .41  | .7  | .41 |     |
| O3    | 0 | .58  | .55  | .71 |     | .47  | .69 | .49 | WET |
|       |   | .53  | .48  | .66 |     | .41  | .7  | .41 |     |
| NO2   | 1 | .57  | .55  | .51 |     | .69  | .5  | .6  | WET |
|       |   | .63  | .57  | .54 |     | .79  | .67 | .57 |     |
| NO2   | 0 | .57  | .55  | .51 |     | .69  | .5  | .6  | WET |
|       |   | .63  | .57  | .54 |     | .79  | .67 | .57 |     |
| NO    | 1 | .55  | .53  | .45 |     | .68  | .53 | .54 | WET |
|       |   | .55  | .64  | .44 |     | .51  | .58 | .6  |     |
| NO    | 0 | .55  | .53  | .45 |     | .68  | .53 | .54 | WET |
|       |   | .55  | .64  | .44 |     | .51  | .58 | .6  |     |
| CO    | 1 | .35  |      |     |     | .23  | .48 |     | WET |
|       |   | .63  |      |     |     | .56  | .7  |     |     |
| CO    | 0 | .35  |      |     |     | .23  | .48 |     | WET |
|       |   | .63  |      |     |     | .56  | .7  |     |     |
|       |   | Mean | SJDC | SAN | CAM | MASP | SOR |     |     |

Figure S2. Correlation between observation and simulations for each period and activation of aerosol feedbacks for each region, 0 without effects and 1, including effects. Only significant correlations (p.value <0.05) are displayed.

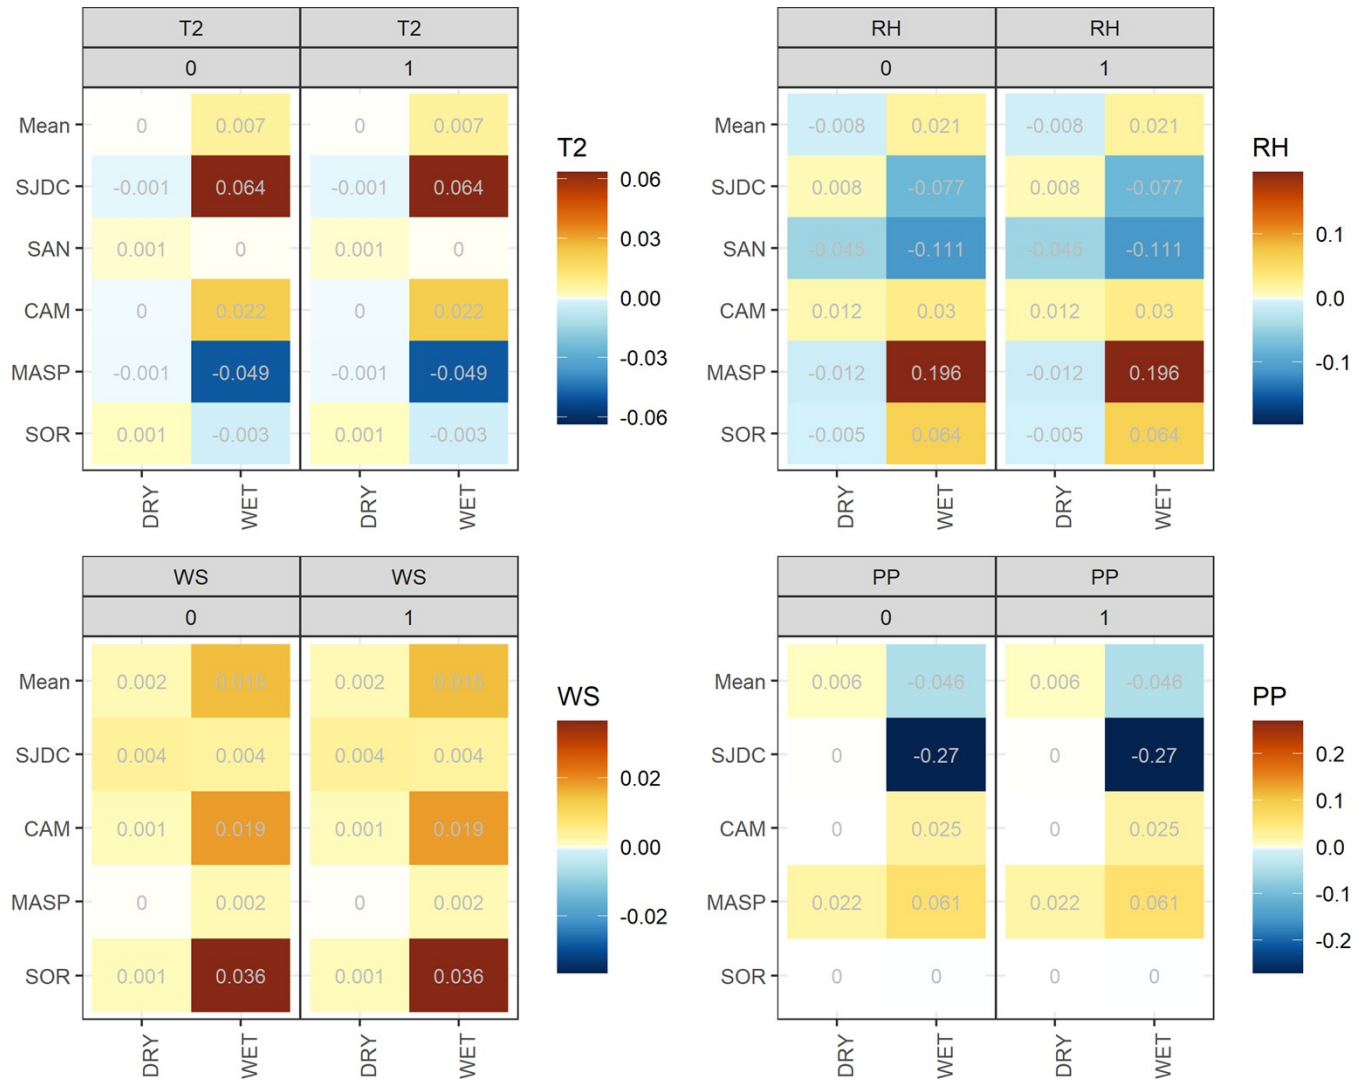

Figure S3. Mean bias of 2-meters temperature (T2 °C), relative humidity (RH %), wind speed (WS ms<sup>-1</sup>), and precipitation (PP mm) for each period and activation of aerosol feedbacks for each region. Mean bias defined as  $\frac{1}{n} \sum_{i=1}^n (sim_i - mod_i)$  where *obs* are observations and *sim*, simulations.

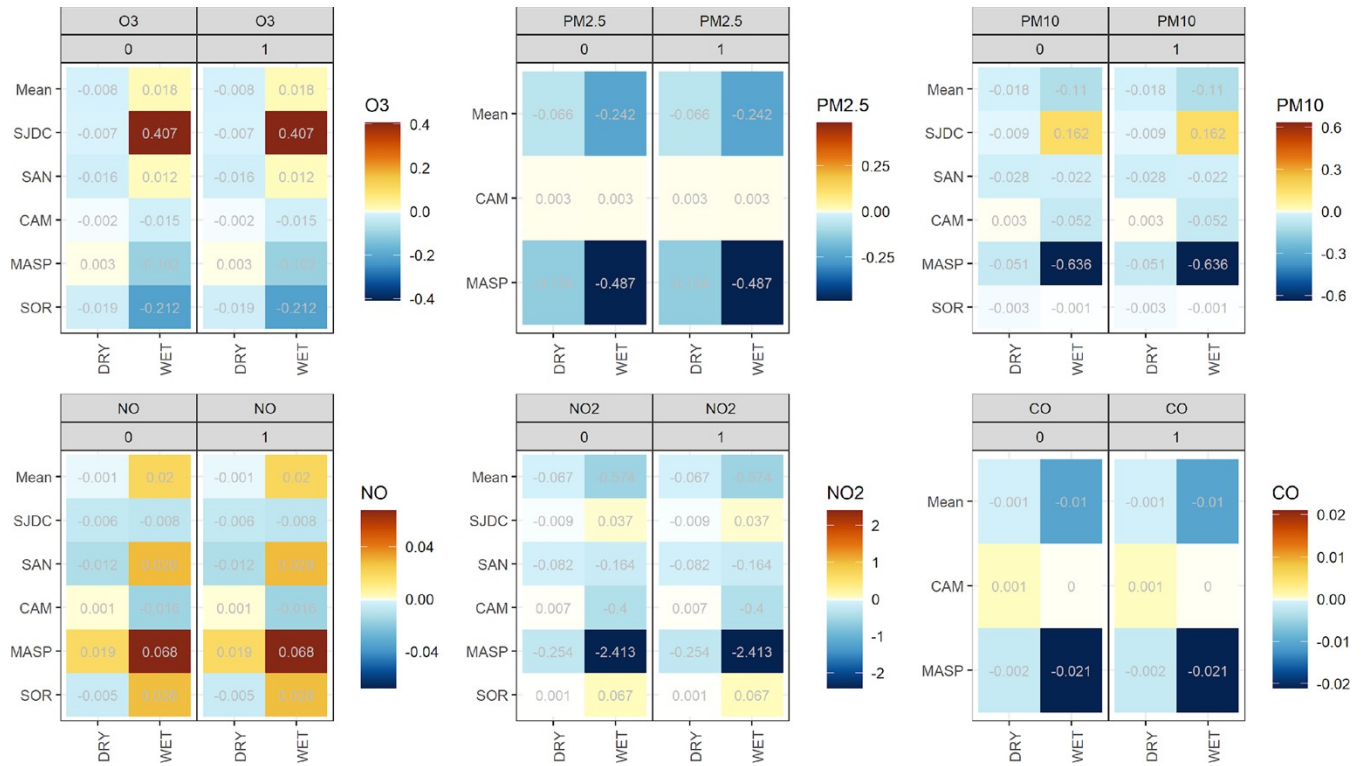

Figure S4. Mean bias of ozone (O<sub>3</sub> μgm<sup>-3</sup>), particulate matter aerodynamical diameter equal or less than 2.5 μm (PM<sub>2.5</sub> μgm<sup>-3</sup>) and 10 μm (PM<sub>10</sub> μgm<sup>-3</sup>), nitrogen monoxide (NO μgm<sup>-3</sup>), nitrogen dioxide (NO<sub>2</sub> μgm<sup>-3</sup>) and carbon monoxide (CO ppm) for each period and activation of aerosol feedbacks for each region. Mean bias defined as  $\frac{1}{n} \sum_{i=1}^n (sim_i - mod_i)^2$  where *obs* are observations and *sim*, simulations.

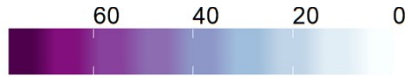

|       |   |       |       |       |       |       |       |     |
|-------|---|-------|-------|-------|-------|-------|-------|-----|
| WS    | 1 | 1.13  | 1.12  |       | 1.15  | 1.26  | 1.01  | WET |
|       |   | 0.92  | 0.88  |       | 1.1   | 0.92  | 0.79  |     |
| WS    | 0 | 1.13  | 1.12  |       | 1.15  | 1.26  | 1.01  | WET |
|       |   | 0.92  | 0.88  |       | 1.1   | 0.92  | 0.79  |     |
| T2    | 1 | 2.52  | 2.37  | 2.61  | 2.74  | 2.62  | 2.26  | WET |
|       |   | 1.58  | 1.85  | 1.96  | 1.22  | 1.59  | 1.28  |     |
| T2    | 0 | 2.52  | 2.37  | 2.61  | 2.74  | 2.62  | 2.26  | WET |
|       |   | 1.58  | 1.85  | 1.96  | 1.22  | 1.59  | 1.28  |     |
| RH    | 1 | 12.53 | 12.98 | 9.05  | 15.46 | 13.12 | 12.04 | WET |
|       |   | 10.93 | 12.6  | 8.27  | 13.59 | 10.58 | 9.6   |     |
| RH    | 0 | 12.53 | 12.98 | 9.05  | 15.46 | 13.12 | 12.04 | WET |
|       |   | 10.93 | 12.6  | 8.27  | 13.59 | 10.58 | 9.6   |     |
| PP    | 1 | 2.87  | 3.44  |       | 2.34  | 3.16  | 2.53  | WET |
|       |   | 0.16  | 0.04  |       | 0     | 0.61  | 0     |     |
| PP    | 0 | 2.87  | 3.44  |       | 2.34  | 3.16  | 2.53  | WET |
|       |   | 0.16  | 0.04  |       | 0     | 0.61  | 0     |     |
| PM2.5 | 1 | 13.91 |       |       | 9.95  | 17.86 |       | WET |
|       |   | 12.68 |       |       | 12.5  | 12.86 |       |     |
| PM2.5 | 0 | 13.91 |       |       | 9.95  | 17.86 |       | WET |
|       |   | 12.68 |       |       | 12.5  | 12.86 |       |     |
| PM10  | 1 | 25.35 | 17.39 | 38.2  | 24.08 | 24.3  | 22.76 | WET |
|       |   | 23.08 | 20.12 | 36.36 | 35.09 | 22.59 | 22.32 |     |
| PM10  | 0 | 25.35 | 17.39 | 38.2  | 24.08 | 24.3  | 22.76 | WET |
|       |   | 23.08 | 20.12 | 36.36 | 35.09 | 22.59 | 22.32 |     |
| O3    | 1 | 28.72 | 28.31 | 17.76 | 37.58 | 27.31 | 32.64 | WET |
|       |   | 30.3  | 33.35 | 20.02 | 35.28 | 36    | 36.83 |     |
| O3    | 0 | 28.72 | 28.31 | 17.76 | 37.58 | 27.31 | 32.64 | WET |
|       |   | 30.3  | 33.35 | 20.02 | 35.28 | 36    | 36.83 |     |
| NO2   | 1 | 27.49 | 16.7  | 21.12 | 13.86 | 76.81 | 8.96  | WET |
|       |   | 19.79 | 9.68  | 19.62 | 15.46 | 45.04 | 9.13  |     |
| NO2   | 0 | 27.49 | 16.7  | 21.12 | 13.86 | 76.81 | 8.96  | WET |
|       |   | 19.79 | 9.68  | 19.62 | 15.46 | 45.04 | 9.13  |     |
| NO    | 1 | 13.83 | 10.31 | 30.21 | 2.37  | 21.53 | 4.7   | WET |
|       |   | 14.51 | 6.47  | 30.32 | 7.71  | 23.67 | 4.38  |     |
| NO    | 0 | 13.83 | 10.31 | 30.21 | 2.37  | 21.53 | 4.7   | WET |
|       |   | 14.51 | 6.47  | 30.32 | 7.71  | 23.67 | 4.38  |     |
| CO    | 1 | 0.6   |       |       | 0.51  | 0.69  |       | WET |
|       |   | 0.42  |       |       | 0.44  | 0.41  |       |     |
| CO    | 0 | 0.6   |       |       | 0.51  | 0.69  |       | WET |
|       |   | 0.42  |       |       | 0.44  | 0.41  |       |     |
|       |   | Mean  | SJDC  | SAN   | CAM   | MASP  | SOR   |     |

Figure S5. Root mean square error (RMSE) between observation and simulations for each period and activation of aerosol feedbacks for each region. RMSE defined as  $\sqrt{\frac{1}{n} \sum_{i=1}^n (sim_i - obs_i)^2}$  where *obs* are observations and *sim* the simulations for each timestep *i*.



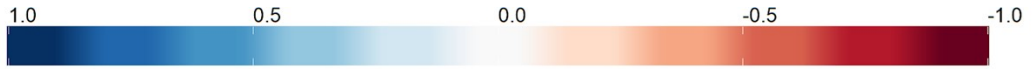

|       |   | CAM |     |     |     |     | MASP |     |     |     |     |     |     |     |     |     | SAN |     | SJDC |     | SOR |     |     |     |     |            |            |            |     |     |            |            |            |            |
|-------|---|-----|-----|-----|-----|-----|------|-----|-----|-----|-----|-----|-----|-----|-----|-----|-----|-----|------|-----|-----|-----|-----|-----|-----|------------|------------|------------|-----|-----|------------|------------|------------|------------|
| WS    | 1 | .44 | .59 | .62 | .59 | .54 | .65  |     |     | .6  | .45 | .51 |     | .5  | .6  | .69 | .58 |     |      | .57 | .54 |     |     | .61 | .72 | .71        | WET<br>DRY |            |     |     |            |            |            |            |
|       | 0 | .37 | .7  | .74 | .79 | .82 | .75  |     |     | .74 | .8  | .73 |     | .51 | .84 | .85 | .57 |     |      | .87 | .81 |     |     | .61 | .72 | .71        |            | WET<br>DRY |     |     |            |            |            |            |
| T2    | 1 | .85 | .84 | .88 |     |     | .83  | .86 |     |     | .85 |     |     | .84 | .86 | .87 | .87 |     |      | .86 | .87 | .49 |     | .9  | .9  | .91        | WET<br>DRY |            |     |     |            |            |            |            |
|       | 0 | .96 | .96 | 1   |     |     | .95  | .95 |     |     | .95 |     |     | .94 | .96 | .97 | .97 |     |      | .96 | .97 | .74 |     | .95 | .98 | .96        |            | WET<br>DRY |     |     |            |            |            |            |
| RH    | 1 | .83 | .78 |     |     |     | .75  | .8  |     |     | .81 |     |     | .79 | .79 | .85 | .83 |     |      | .81 | .81 | .64 |     | .83 | .87 | .88        | WET<br>DRY |            |     |     |            |            |            |            |
|       | 0 | .86 | .83 |     |     |     | .74  | .89 |     |     | .88 |     |     | .84 | .9  | .91 | .9  |     |      | .89 | .91 | .8  |     | .86 | .94 | .84        |            | WET<br>DRY |     |     |            |            |            |            |
| PP    | 1 | .33 |     |     |     |     |      |     |     |     |     |     | .42 |     |     |     |     |     |      |     |     |     |     | .38 |     | .56        | WET<br>DRY |            |     |     |            |            |            |            |
|       | 0 | .33 |     |     |     |     |      |     |     |     |     |     | .42 |     |     |     |     |     |      |     |     |     |     | .38 |     | .56        |            | WET<br>DRY |     |     |            |            |            |            |
| PM2.5 | 1 | .26 |     |     |     |     |      |     |     | .5  |     |     |     | .43 |     | .46 |     |     |      | .43 | .54 |     |     |     |     | WET<br>DRY |            |            |     |     |            |            |            |            |
|       | 0 | .29 |     |     |     |     |      |     |     | .68 |     |     |     | .67 |     | .44 |     |     |      | .6  | .79 |     |     |     |     |            | WET<br>DRY |            |     |     |            |            |            |            |
| PM10  | 1 | .31 | .29 | .34 | .32 | .39 | .25  | .96 | .53 | .43 | .5  | .71 | .53 | .55 | .46 | .4  | .53 | .4  | .49  | .32 | .37 | .38 | .46 | .47 | .5  | .42        | .39        | .38        | .23 | .4  | .31        | .25        | .33        | WET<br>DRY |
|       | 0 | .3  | .24 | .41 | .3  | .48 | .38  | .32 | .56 | .47 | .66 | .73 | .68 | .64 | .6  | .46 | .64 | .39 | .66  | .32 | .42 | .5  | .57 | .65 | .64 | .4         | .44        | .45        | .31 | .29 | .3         | .24        | .34        |            |
| O3    | 1 | .32 | .5  | .4  | .62 |     | .49  | .72 | .7  | .63 | .81 | .68 | .68 | .72 | .74 | .66 | .59 | .67 | .71  | .6  | .75 | .64 | .67 | .75 | .6  | .75        | .78        | .55        | .34 | .64 | WET<br>DRY |            |            |            |
|       | 0 | .38 | .4  | .32 | .51 |     | .45  | .69 | .75 | .69 | .78 | .78 | .71 | .76 | .66 | .6  | .64 | .69 | .68  | .64 | .77 | .66 | .63 | .74 | .6  | .67        | .71        | .48        | .35 | .47 |            | WET<br>DRY |            |            |
| NO2   | 1 | .59 | .98 | .59 | .6  |     |      | .52 | .55 |     | .4  | .44 | .5  |     | .61 | .47 |     | .56 | .47  | .47 |     | .45 | .44 | .44 | .56 | .61        | .58        | .38        | .56 | .55 | .49        | .7         | WET<br>DRY |            |
|       | 0 | .71 | .82 | .82 | .81 |     |      | .63 | .72 |     | .58 | .56 | .59 |     | .74 | .56 |     | .73 | .61  | .82 |     | .6  | .63 | .73 | .74 | .8         | .68        | .44        | .51 | .57 | .51        | .64        |            | WET<br>DRY |
| NO    | 1 | .61 | .96 | .5  | .65 |     |      | .55 | .56 |     | .51 | .56 | .43 |     | .6  | .41 |     | .59 | .6   | .49 |     | .41 | .62 | .55 | .54 | .58        | .54        | .36        | .44 | .53 | .52        | .56        | WET<br>DRY |            |
|       | 0 | .58 | .43 | .51 | .54 |     |      | .55 | .53 |     | .57 | .75 | .52 |     | .57 | .5  |     | .64 | .65  | .5  |     | .33 | .62 | .77 | .54 | .65        | .55        | .32        | .45 | .64 | .59        | .61        |            | WET<br>DRY |
| CO    | 1 |     |     |     |     |     | .23  | .56 | .51 | .57 |     | .44 | .44 | .44 |     | .48 |     |     | .42  |     | .5  |     | .42 | .49 | .45 | .52        |            |            |     |     |            |            | WET<br>DRY |            |
|       | 0 |     |     |     |     |     | .56  | .66 | .65 | .82 |     | .72 | .69 | .64 |     | .71 |     |     | .64  |     | .72 |     | .61 | .74 | .71 | .75        |            |            |     |     |            |            |            | WET<br>DRY |

Figure S6. Correlation between observation and simulations for each period and activation of aerosol feedbacks for each Station. Only significant correlations (p.value <0.05) are displayed.



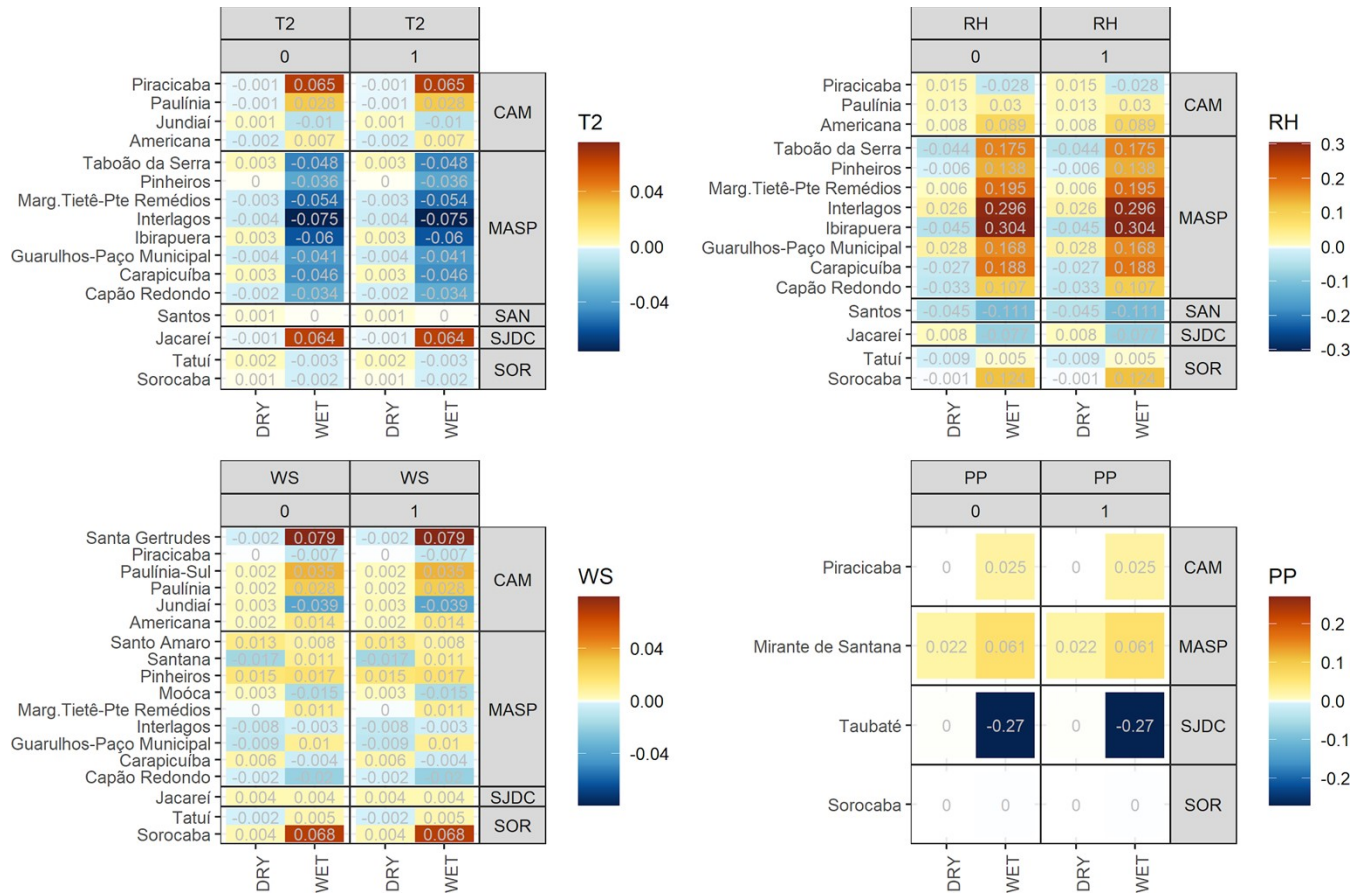

Figure S7. Mean bias of 2-meter temperature (T2 °C), relative humidity (RH %), wind speed (WS ms<sup>-1</sup>), and precipitation (PP mm) for each period and activation of aerosol feedbacks for each Station. Mean bias defined as  $\sum_{i=1}^n (sim_i - mod_i)^2$  where *obs* are observations and *sim*, simulations.

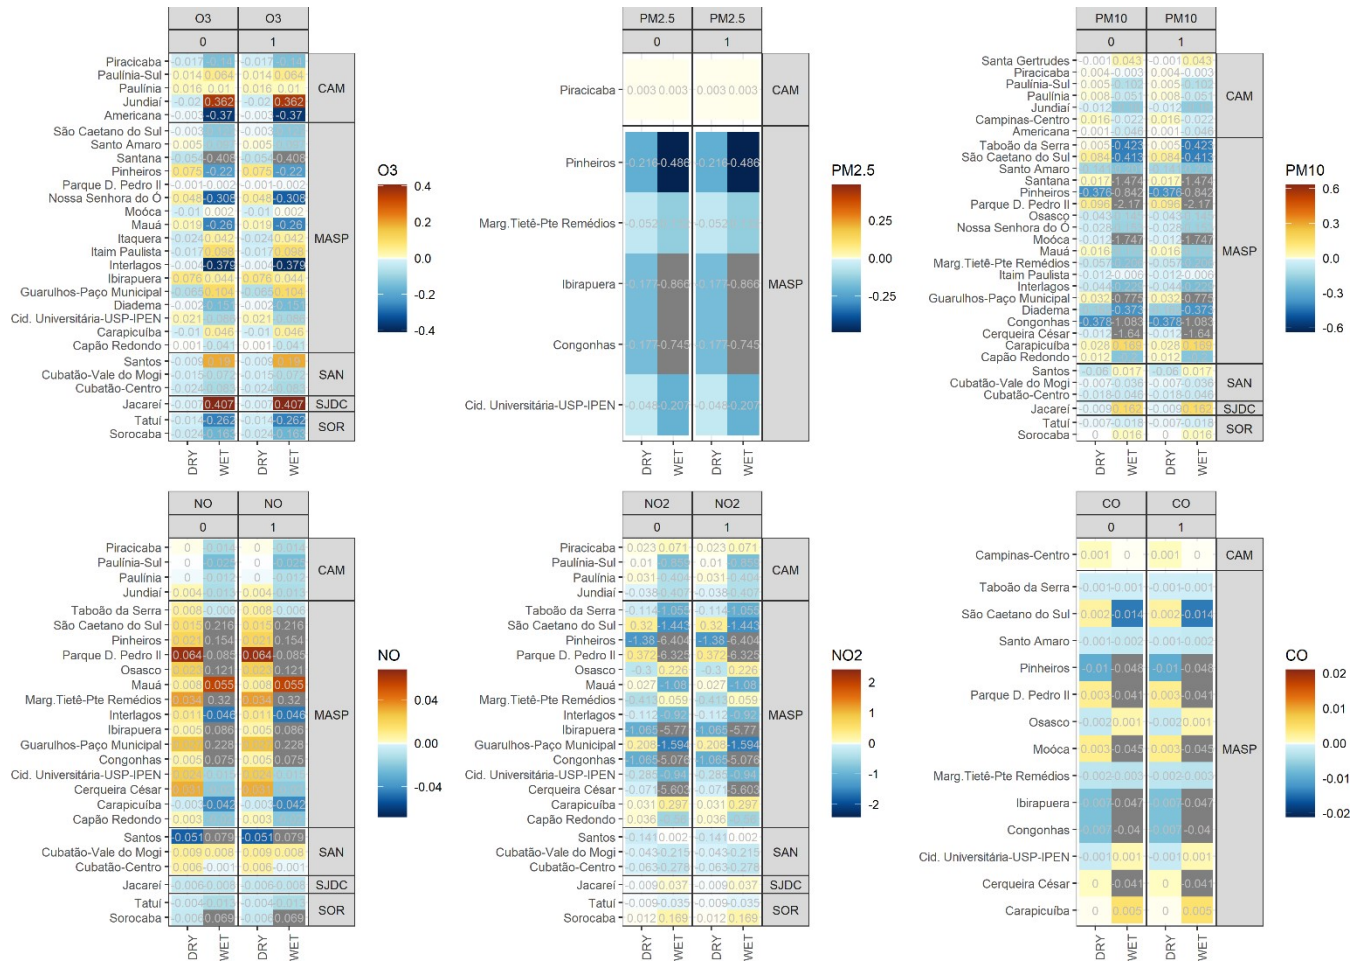

Figure S8. Mean bias of ozone (O<sub>3</sub> μg m<sup>-3</sup>), particulate matter aerodynamical diameter equal or less than 2.5 μm (PM<sub>2.5</sub> μg m<sup>-3</sup>) and 10 μm (PM<sub>10</sub> μg m<sup>-3</sup>), nitrogen monoxide (NO μg m<sup>-3</sup>), nitrogen dioxide (NO<sub>2</sub> μg m<sup>-3</sup>) and carbon monoxide (CO ppm) for each period and activation of aerosol feedbacks for each Station. Mean bias defined as  $\sum_{i=1}^n (sim_i - mod_i)^2$  where *obs* are observations and *sim*, simulations.

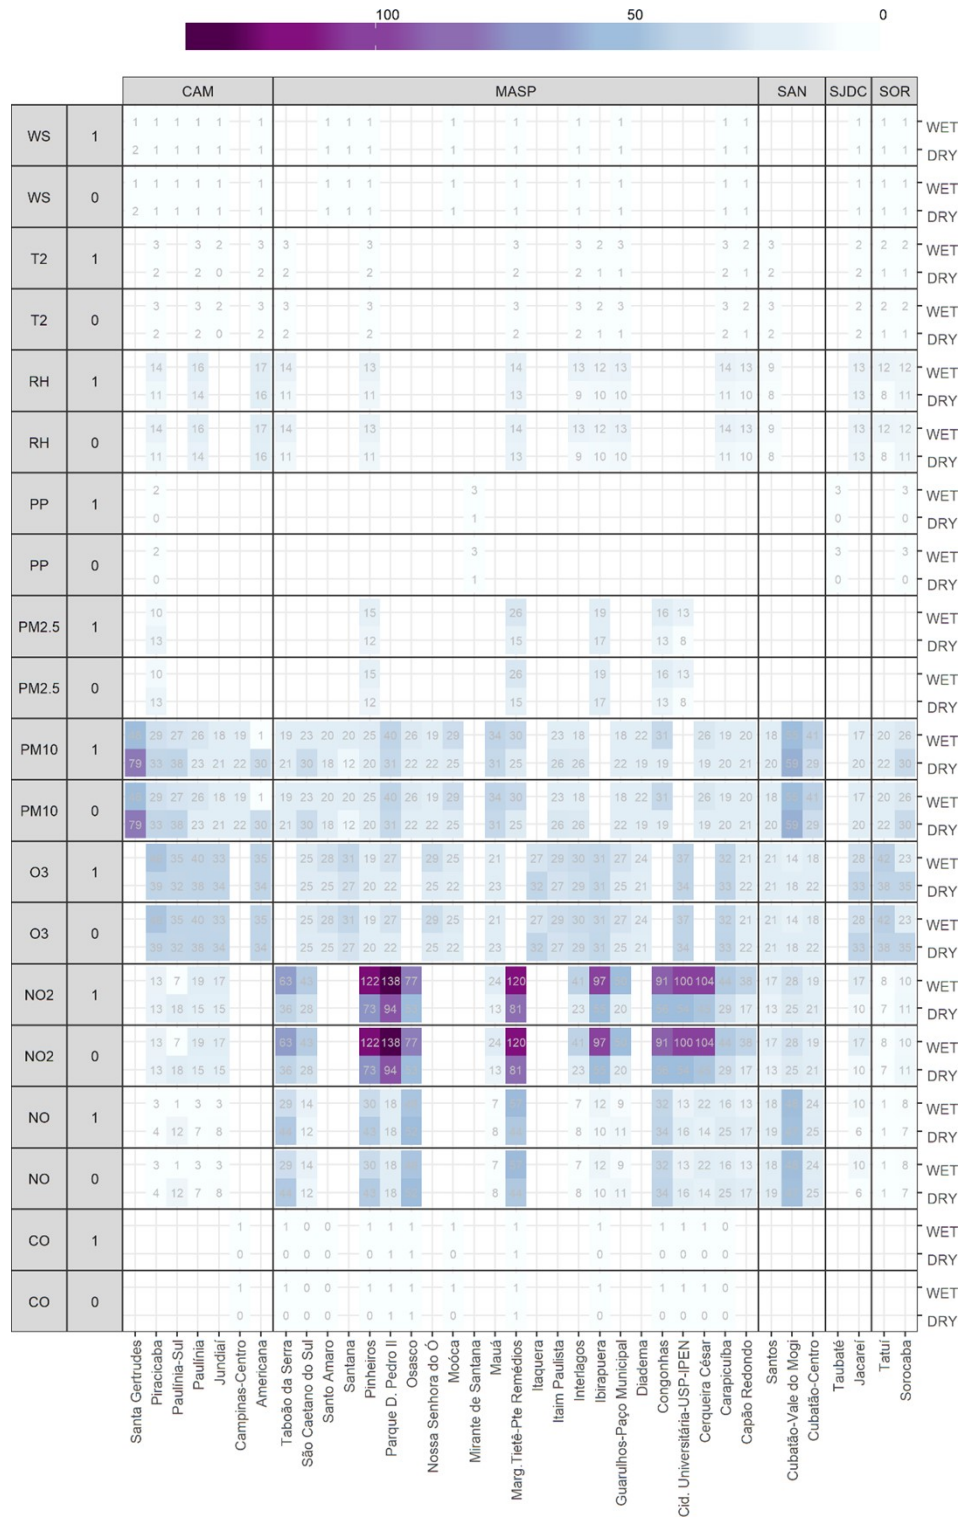

Figure S9. Root mean square error (RMSE) between observation and simulations for each period and activation of aerosol feedbacks for each Station. RMSE defined as  $\sqrt{\frac{1}{n} \sum_{i=1}^n (sim_i - obs)^2}$  where *obs* are observations and *sim*, simulations.



# Synoptic analysis

Dry period: October 5th - 10th, 2014

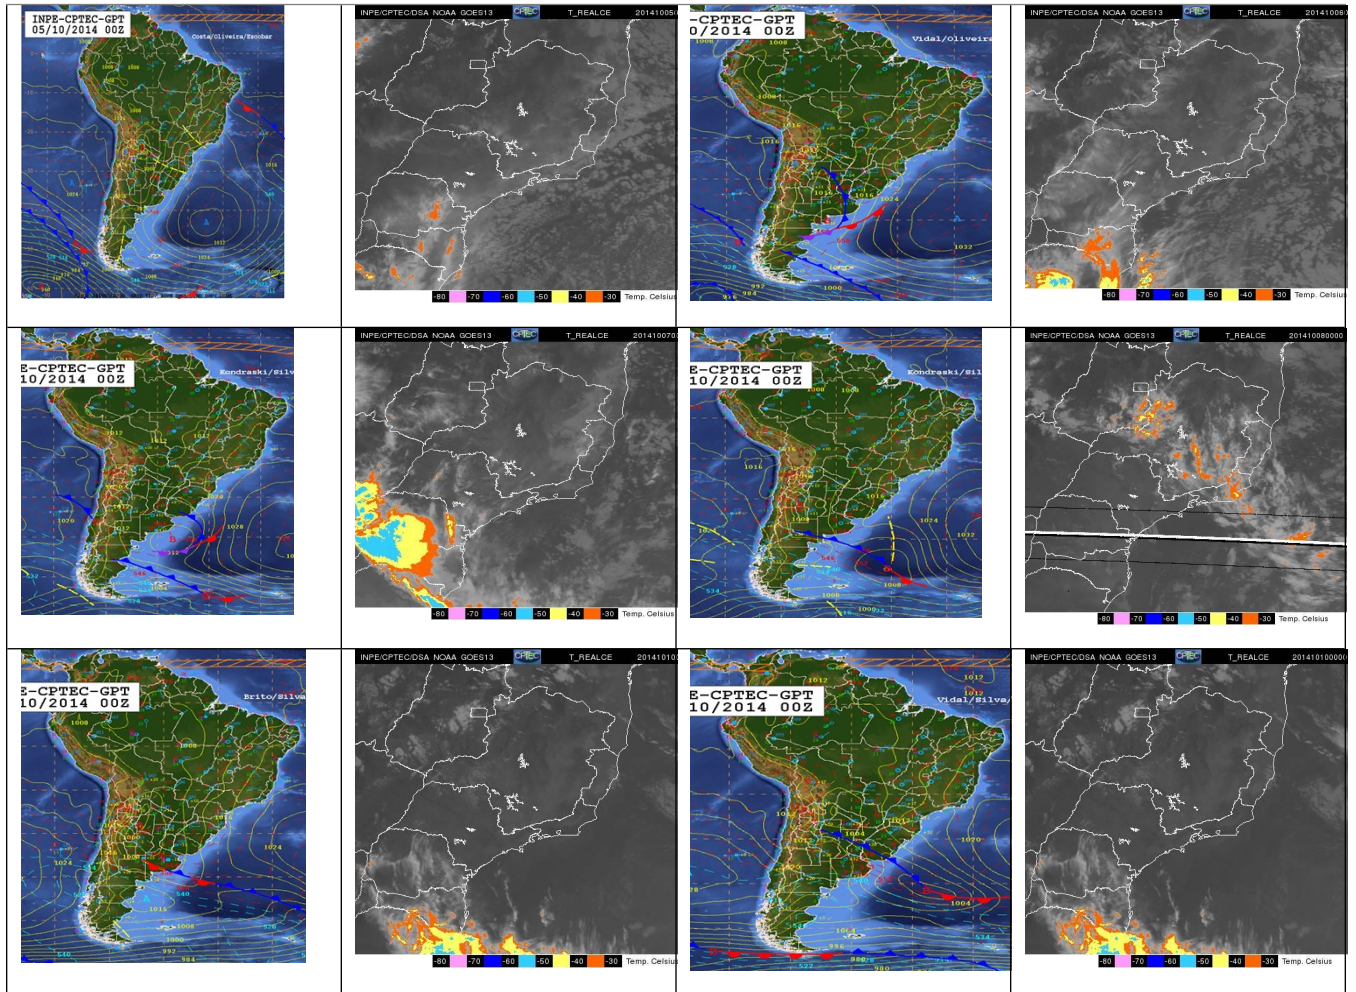

Figure S10. Synoptic charts from Center for Weather Forecasting and Climate Studies (CPTEC in Portuguese, <http://tempo.cptec.inpe.br/boletimtecnico>) and Geostationary Environmental Satellite (GOES-13, <http://satellite.cptec.inpe.br/acervo/goes.formulario.logic?i=en>) satellite images on the infrared channel ( $\sim 11.0 \mu\text{m}$ ) between October 5th - 10th, 2014, at 00 UTC.

Wet Period: October 31st - November 5th, 2014

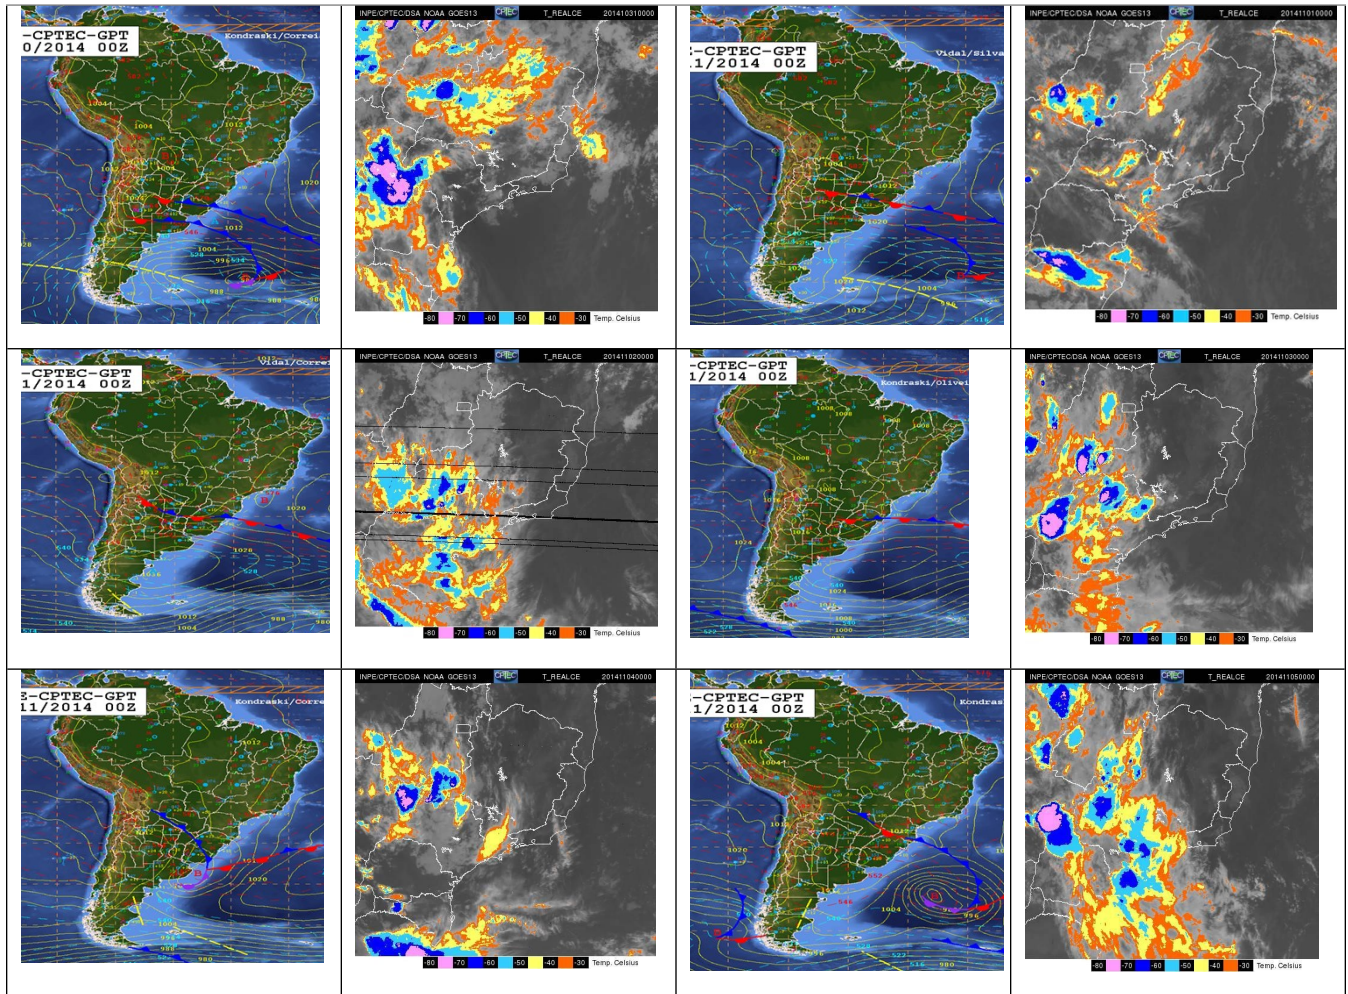

Figure S11. Synoptic charts from Center for Weather Forecasting and Climate Studies (CPTEC in Portuguese, <http://tempo.cptec.inpe.br/boletimtecnico>) and Geostationary Environmental Satellite (GOES-13, <http://satellite.cptec.inpe.br/acervo/goes.formulario.logic?i=en>) satellite images on the infrared channel (~ 11.0 μm) between October 31st - November 5th, 2014 at 00 UTC.
